# Supplementary material
Source: PubMed Central journal article supplement (PMC4232184)
Supplement: NIHMS640610-supplement-Supp_Fig_1.pdf [file NIHMS640610-supplement-Supp_Fig_1.pdf]

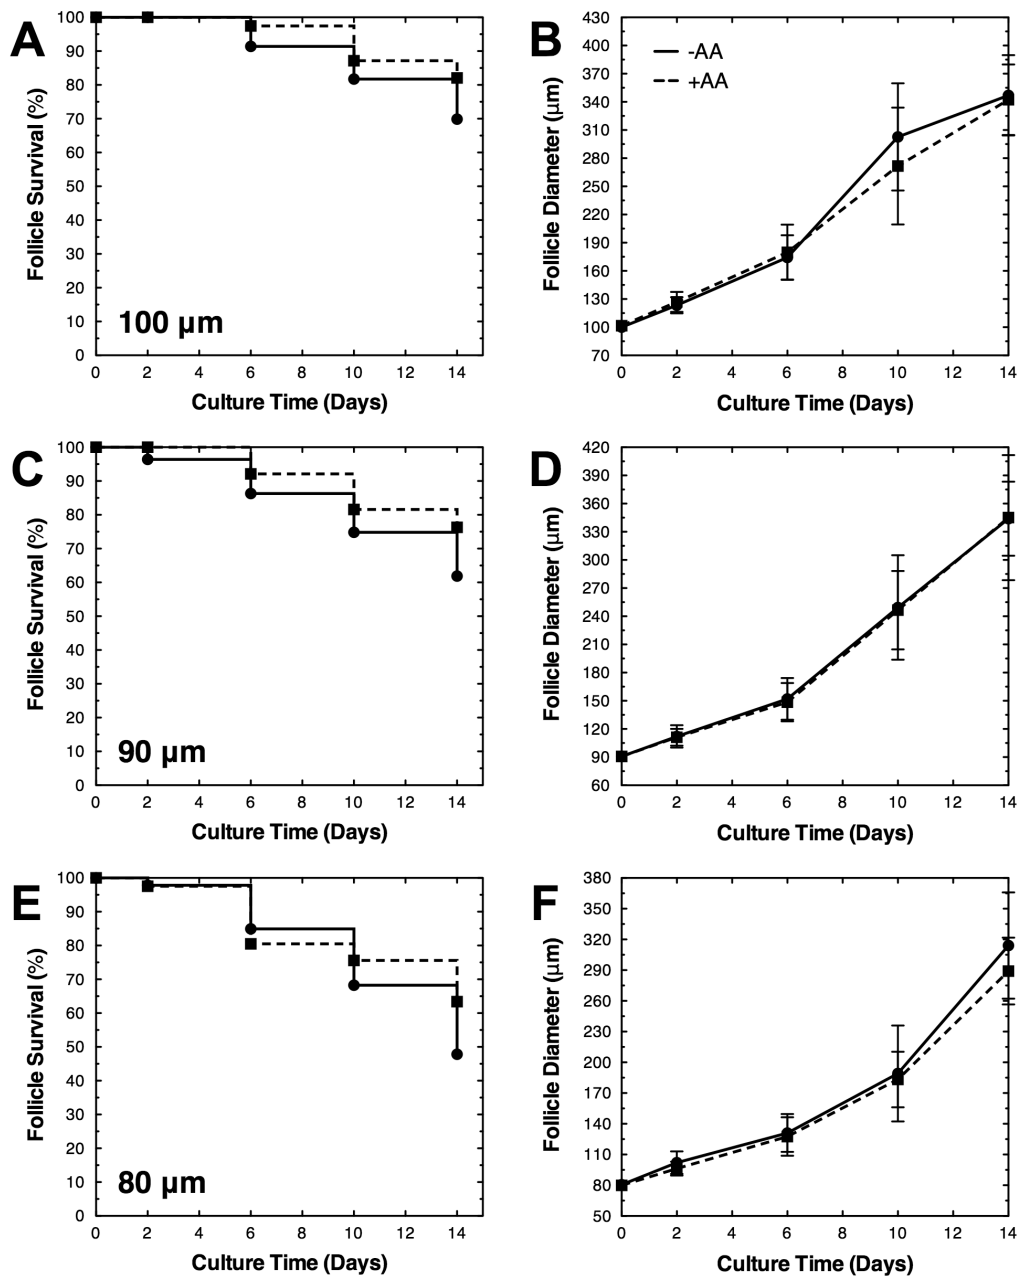

**Supplementary Figure 1: Survival and Growth of Follicles (80-100 μm)**

The survival and growth (diameter mean  $\pm$  standard deviation) of early secondary (90-100 μm) and late primary follicles (80 μm) in the absence (-AA) and presence (+AA) of ascorbic acid: (A-B) 100 μm, (C-D) 90 μm, and (E-F) 80 μm. No significant differences in survival or growth were observed ( $p > 0.05$ ).
