# Supplementary material
Source: PubMed Central journal article supplement (PMC4232184)
Supplement: NIHMS640610-supplement-Supp_Table_1.pdf [file NIHMS640610-supplement-Supp_Table_1.pdf]

**Supplemental Table 1: Microarray of Genes Involved in the Ascorbate/Aldarate Pathway (mRNA Expression Levels)**

| NAME    |                                                              | ENTREZ | P-VALUE  | AVERAGE INTENSITY (LOG-2) |       |       |       | FOLD CHANGE  |             |            |
|---------|--------------------------------------------------------------|--------|----------|---------------------------|-------|-------|-------|--------------|-------------|------------|
| SYMBOL  | DESCRIPTION                                                  |        |          | PMD3                      | PMD4  | PRI   | 2LS   | PMD4 vs PMD3 | PRI vs PMD4 | 2LS vs PRI |
| Aldh1a1 | Aldehyde dehydrogenase family 1, subfamily A1                | 11668  | 2.73E-03 | 9.68                      | 9.41  | 8.64  | 9.01  | -1.21        | -1.70       | 1.29       |
| Aldh2   | Aldehyde dehydrogenase 2, mitochondrial                      | 11669  | 1.28E-01 | 13.16                     | 13.34 | 13.54 | 13.37 | 1.13         | 1.15        | -1.13      |
| Bckdha  | Branched chain ketoacid dehydrogenase E1, alpha polypeptide  | 12039  | 3.88E-02 | 9.96                      | 9.91  | 9.95  | 10.08 | -1.04        | 1.03        | 1.10       |
| Bckdhb  | Branched chain ketoacid dehydrogenase E1, beta polypeptide   | 12040  | 1.62E-03 | 7.86                      | 8.08  | 8.05  | 7.94  | 1.17         | -1.03       | -1.07      |
| Gsto1   | Glutathione S-transferase omega 1                            | 14873  | 3.25E-06 | 10.21                     | 10.35 | 10.10 | 10.17 | 1.10         | -1.19       | 1.05       |
| Aldh1a2 | Aldehyde dehydrogenase family 1, subfamily A2                | 19378  | 5.31E-07 | 8.45                      | 8.44  | 7.78  | 7.90  | -1.01        | -1.58       | 1.09       |
| Aldh1a2 | Aldehyde dehydrogenase family 1, subfamily A2                | 19378  | 1.23E-06 | 8.09                      | 8.06  | 7.68  | 7.74  | -1.02        | -1.30       | 1.05       |
| Aldh1a7 | Aldehyde dehydrogenase family 1, subfamily A7                | 26358  | 4.13E-05 | 7.70                      | 7.66  | 7.63  | 7.76  | -1.03        | -1.02       | 1.09       |
| Akr1a4  | Aldo-keto reductase family 1, member A4 (aldehyde reductase) | 58810  | 2.86E-01 | 12.76                     | 12.80 | 12.75 | 12.41 | 1.03         | -1.03       | -1.27      |
| Akr1a4  | Aldo-keto reductase family 1, member A4 (aldehyde reductase) | 58810  | 2.10E-03 | 12.82                     | 12.62 | 12.42 | 12.50 | -1.15        | -1.15       | 1.06       |
| Akr1a4  | Aldo-keto reductase family 1, member A4 (aldehyde reductase) | 58810  | 1.59E-02 | 13.35                     | 12.92 | 12.81 | 13.00 | -1.35        | -1.08       | 1.14       |
| Fam123a | Family with sequence similarity 123, member A                | 72125  | 3.39E-06 | 7.70                      | 7.76  | 7.75  | 7.69  | 1.05         | -1.01       | -1.04      |
| Fam123a | Family with sequence similarity 123, member A                | 72125  | 4.86E-05 | 8.62                      | 8.94  | 8.57  | 8.44  | 1.24         | -1.29       | -1.10      |
| Aldh1b1 | Aldehyde dehydrogenase 1 family, member B1                   | 72535  | 8.39E-07 | 9.63                      | 8.90  | 8.51  | 8.50  | -1.65        | -1.32       | -1.01      |
| Gulo    | Gulonolactone (L-) oxidase                                   | 268756 | 2.29E-04 | 7.90                      | 7.86  | 8.11  | 8.06  | -1.03        | 1.18        | -1.03      |

PMD3 = Primordial Follicles (Day 3 Ovaries)

PMD4 = Primordial Follicles (Day 4 Ovaries)

PRI = Primary Follicles

2LS = Two-Layer Secondary Follicles
