# Supplementary material
Source: PubMed Central journal article supplement (PMC4232184)
Supplement: NIHMS640610-supplement-Supp_Table_2.pdf [file NIHMS640610-supplement-Supp_Table_2.pdf]

**Supplemental Table 2: Survival and Growth of Primary Follicles with Glutathione (GSH)**

| Size       | Condition | Day 0 (n) | Day 2 (n, %) | Day 6 (n, %) | Day 10 (n, %) | Day 14 (n, %) | Day 18 (n, %) |
|------------|-----------|-----------|--------------|--------------|---------------|---------------|---------------|
| 70 $\mu$ m | +AA       | 48        | 48 (100%)    | 40 (83%)     | 34 (71%)      | 23 (48%)      | n.d.          |
|            | +GSH      | 33        | 30 (90%)     | 12 (36%)     | 9 (27%)       | 4 (12%)       | n.d.          |
|            | Control   | 150       | 142 (95%)    | 121 (81%)    | 87 (58%)      | 35 (23%)      | n.d.          |
| 60 $\mu$ m | +AA       | 42        | 41 (98%)     | 28 (67%)     | 12 (29%)      | 11 (26%)      | 7 (17%)       |
|            | +GSH      | 18        | 15 (83%)     | 4 (22%)      | 2 (11%)       | 0 (0%)        | 0 (0%)        |
|            | Control   | 24        | 23 (96%)     | 6 (25%)      | 0 (0%)        | 0 (0%)        | 0 (0%)        |

  

| Size       | Condition | Day 0 ( $\mu$ m) | Day 2 ( $\mu$ m) | Day 6 ( $\mu$ m) | Day 10 ( $\mu$ m) | Day 14 ( $\mu$ m) | Day 18 ( $\mu$ m) |
|------------|-----------|------------------|------------------|------------------|-------------------|-------------------|-------------------|
| 70 $\mu$ m | +AA       | 70 $\pm$ 3       | 84 $\pm$ 7       | 106 $\pm$ 15     | 140 $\pm$ 29      | 236 $\pm$ 43      | n.d.              |
|            | +GSH      | 71 $\pm$ 3       | 90 $\pm$ 7       | 111 $\pm$ 10     | 130 $\pm$ 11      | 170 $\pm$ 21      | n.d.              |
|            | Control   | 71 $\pm$ 3       | 91 $\pm$ 10      | 111 $\pm$ 16     | 138 $\pm$ 27      | 251 $\pm$ 47      | n.d.              |
| 60 $\mu$ m | +AA       | 61 $\pm$ 3       | 71 $\pm$ 8       | 92 $\pm$ 15      | 133 $\pm$ 27      | 170 $\pm$ 39      | 253 $\pm$ 39      |
|            | +GSH      | 62 $\pm$ 3       | 81 $\pm$ 5       | 102 $\pm$ 8      | 120 $\pm$ 1       | n.s.              | n.s.              |
|            | Control   | 61 $\pm$ 3       | 70 $\pm$ 6       | 82 $\pm$ 11      | n.s.              | n.s.              | n.s.              |

+GSH represents grouped data from 0.2 mM, 1 mM, and 2 mM conditions, which were not significantly different

Control is -AA/-GSH (control medium or  $\alpha$ MEM supplemented with BSA, fetuin, ITS, and FSH)

Control (70  $\mu$ m) data referenced from Tagler et al. (2012)

Significant differences between conditions were indicated by asterisks ( $p < 0.05$ )

Diameter presented as mean  $\pm$  standard deviation

n.d. indicates experiment not done

n.s. indicates no surviving follicles
