# Supplementary material
Source: PubMed Central journal article supplement (PMC4232184)
Supplement: NIHMS640610-supplement-Supp_Table_3.pdf [file NIHMS640610-supplement-Supp_Table_3.pdf]

**Supplementary Table 3:** Gene Expression of Extracellular Matrix (ECM) and Cell Adhesion Molecules (All Data)

| Gene Id        | Description                                                                                                   | Fold Change   | 95% CI                | P-Value         |
|----------------|---------------------------------------------------------------------------------------------------------------|---------------|-----------------------|-----------------|
| Adamts1        | A disintegrin-like and metallopeptidase (reprolysin type) with thrombospondin type 1 motif, 1                 | 1.3314        | ( 1.01, 1.65 )        | 0.078127        |
| Adamts2        | A disintegrin-like and metallopeptidase (reprolysin type) with thrombospondin type 1 motif, 2                 | 0.8025        | ( 0.75, 0.86 )        | 0.000789        |
| Adamts5        | A disintegrin-like and metallopeptidase (reprolysin type) with thrombospondin type 1 motif, 5 (aggrecanase-2) | 1.3287        | ( 0.46, 2.20 )        | 0.375742        |
| Adamts8        | A disintegrin-like and metallopeptidase (reprolysin type) with thrombospondin type 1 motif, 8                 | 0.9658        | ( 0.00001, 2.27 )     | 0.484741        |
| Cd44           | CD44 antigen                                                                                                  | 1.3263        | ( 0.63, 2.03 )        | 0.316184        |
| <b>*Cdh1</b>   | <b>Cadherin 1</b>                                                                                             | <b>0.4853</b> | <b>( 0.37, 0.60 )</b> | <b>0.00039</b>  |
| Cdh2           | Cadherin 2                                                                                                    | 0.9672        | ( 0.66, 1.28 )        | 0.780854        |
| Cdh3           | Cadherin 3                                                                                                    | 0.4226        | ( 0.05, 0.79 )        | 0.146559        |
| Cdh4           | Cadherin 4                                                                                                    | 1.0171        | ( 0.35, 1.68 )        | 0.864785        |
| Cntn1          | Contactin 1                                                                                                   | 1.1167        | ( 0.00001, 2.70 )     | 0.487153        |
| Col1a1         | Collagen, type I, alpha 1                                                                                     | 3.1802        | ( 0.76, 5.61 )        | 0.05288         |
| Col2a1         | Collagen, type II, alpha 1                                                                                    | 3.8509        | ( 0.00001, 13.90 )    | 0.195432        |
| Col3a1         | Collagen, type III, alpha 1                                                                                   | 1.7215        | ( 1.18, 2.26 )        | 0.025846        |
| Col4a1         | Collagen, type IV, alpha 1                                                                                    | 1.7688        | ( 1.23, 2.30 )        | 0.014611        |
| <b>*Col4a2</b> | <b>Collagen, type IV, alpha 2</b>                                                                             | <b>2.3052</b> | <b>( 1.52, 3.09 )</b> | <b>0.00733</b>  |
| Col4a3         | Collagen, type IV, alpha 3                                                                                    | 1.4253        | ( 0.62, 2.23 )        | 0.22452         |
| Col5a1         | Collagen, type V, alpha 1                                                                                     | 1.6345        | ( 1.14, 2.13 )        | 0.014246        |
| Col6a1         | Collagen, type VI, alpha 1                                                                                    | 1.152         | ( 0.29, 2.01 )        | 0.851439        |
| Ctgf           | Connective tissue growth factor                                                                               | 1.2056        | ( 0.72, 1.69 )        | 0.382354        |
| Ctnna1         | Catenin (cadherin associated protein), alpha 1                                                                | 0.8137        | ( 0.73, 0.90 )        | 0.009532        |
| Ctnna2         | Catenin (cadherin associated protein), alpha 2                                                                | 1.0842        | ( 0.18, 1.99 )        | 0.822368        |
| Ctnnb1         | Catenin (cadherin associated protein), beta 1                                                                 | 0.7936        | ( 0.64, 0.95 )        | 0.060991        |
| Ecm1           | Extracellular matrix protein 1                                                                                | 1.6714        | ( 1.43, 1.92 )        | 0.000658        |
| Emilin1        | Elastin microfibril interfacier 1                                                                             | 1.2637        | ( 0.61, 1.91 )        | 0.675869        |
| <b>*Entpd1</b> | <b>Ectonucleoside triphosphate diphosphohydrolase 1</b>                                                       | <b>0.4822</b> | <b>( 0.34, 0.63 )</b> | <b>0.002935</b> |
| Fbln1          | Fibulin 1                                                                                                     | 0.866         | ( 0.73, 1.00 )        | 0.111354        |
| <b>*Fn1</b>    | <b>Fibronectin 1</b>                                                                                          | <b>3.2415</b> | <b>( 2.48, 4.01 )</b> | <b>0.000005</b> |
| Hapln1         | Hyaluronan and proteoglycan link protein 1                                                                    | 0.5151        | ( 0.15, 0.88 )        | 0.122023        |
| Hc             | Hemolytic complement                                                                                          | 0.5106        | ( 0.00001, 2.26 )     | 0.674741        |
| Icam1          | Intercellular adhesion molecule 1                                                                             | 1.0144        | ( 0.85, 1.18 )        | 0.89718         |
| <b>*Itga2</b>  | <b>Integrin alpha 2</b>                                                                                       | <b>0.3455</b> | <b>( 0.24, 0.45 )</b> | <b>0.002473</b> |
| Itga3          | Integrin alpha 3                                                                                              | 1.4944        | ( 1.26, 1.73 )        | 0.002257        |
| Itga4          | Integrin alpha 4                                                                                              | 6.9667        | ( 0.00001, 25.77 )    | 0.104377        |
| Itga5          | Integrin alpha 5 (fibronectin receptor alpha)                                                                 | 0.8197        | ( 0.73, 0.91 )        | 0.012424        |
| Itgae          | Integrin alpha E, epithelial-associated                                                                       | 1.104         | ( 0.25, 1.96 )        | 0.613172        |
| Itgal          | Integrin alpha L                                                                                              | 18.7969       | ( 0.00001, 67.56 )    | 0.159671        |

|               |                                                               |               |                           |                 |
|---------------|---------------------------------------------------------------|---------------|---------------------------|-----------------|
| Itgam         | Integrin alpha M                                              | 14.8365       | ( 0.00001, 42.17 )        | 0.087003        |
| Itgav         | Integrin alpha V                                              | 0.7158        | ( 0.62, 0.81 )            | 0.004135        |
| Itgax         | Integrin alpha X                                              | 1.6158        | ( 0.00001, 3.99 )         | 0.382954        |
| Itgb1         | Integrin beta 1 (fibronectin receptor beta)                   | 0.831         | ( 0.58, 1.09 )            | 0.283103        |
| Itgb2         | Integrin beta 2                                               | 0.9507        | ( 0.54, 1.36 )            | 0.974854        |
| Itgb3         | Integrin beta 3                                               | 1.0448        | ( 0.77, 1.32 )            | 0.650141        |
| Itgb4         | Integrin beta 4                                               | 1.3585        | ( 0.89, 1.83 )            | 0.129847        |
| Lama1         | Laminin, alpha 1                                              | 1.0273        | ( 0.90, 1.15 )            | 0.659334        |
| Lama2         | Laminin, alpha 2                                              | 1.3132        | ( 0.92, 1.70 )            | 0.123546        |
| Lama3         | Laminin, alpha 3                                              | 0.5483        | ( 0.12, 0.98 )            | 0.23183         |
| Lamb2         | Laminin, beta 2                                               | 1.1747        | ( 1.04, 1.31 )            | 0.032743        |
| Lamb3         | Laminin, beta 3                                               | 1.2991        | ( 0.00001, 5.60 )         | 0.287687        |
| Lamc1         | Laminin, gamma 1                                              | 1.3738        | ( 1.11, 1.64 )            | 0.013673        |
| <b>*Mmp10</b> | <b>Matrix metalloproteinase 10</b>                            | <b>3.9831</b> | <b>( 0.00001, 9.30 )</b>  | <b>0.043207</b> |
| Mmp11         | Matrix metalloproteinase 11                                   | 1.2755        | ( 1.04, 1.51 )            | 0.041379        |
| <b>*Mmp12</b> | <b>Matrix metalloproteinase 12</b>                            | <b>9.1316</b> | <b>( 0.00001, 29.91 )</b> | <b>0.005753</b> |
| Mmp13         | Matrix metalloproteinase 13                                   | 1.7152        | ( 0.00001, 8.60 )         | 0.59266         |
| Mmp14         | Matrix metalloproteinase 14 (membrane-inserted)               | 1.2309        | ( 0.81, 1.66 )            | 0.274402        |
| Mmp15         | Matrix metalloproteinase 15                                   | 0.7902        | ( 0.61, 0.97 )            | 0.094607        |
| Mmp1a         | Matrix metalloproteinase 1a (interstitial collagenase)        | 0.3431        | ( 0.09, 0.60 )            | 0.155278        |
| Mmp2          | Matrix metalloproteinase 2                                    | 1.7237        | ( 0.68, 2.77 )            | 0.113119        |
| Mmp3          | Matrix metalloproteinase 3                                    | 0.2371        | ( 0.00001, 1.15 )         | 0.233726        |
| Mmp7          | Matrix metalloproteinase 7                                    | 1.3975        | ( 0.00001, 4.10 )         | 0.609798        |
| Mmp8          | Matrix metalloproteinase 8                                    | 1.0075        | ( 0.00001, 2.04 )         | 0.598212        |
| Mmp9          | Matrix metalloproteinase 9                                    | 5.4801        | ( 0.00001, 14.01 )        | 0.080729        |
| Ncam1         | Neural cell adhesion molecule 1                               | 1.0348        | ( 0.69, 1.38 )            | 0.687284        |
| Ncam2         | Neural cell adhesion molecule 2                               | 0.1574        | ( 0.00001, 0.69 )         | 0.510377        |
| Pecam1        | Platelet/endothelial cell adhesion molecule 1                 | 0.7129        | ( 0.52, 0.91 )            | 0.053912        |
| Postn         | Periostin, osteoblast specific factor                         | 0.7587        | ( 0.20, 1.32 )            | 0.900194        |
| Sele          | Selectin, endothelial cell                                    | 1.0111        | ( 0.35, 1.67 )            | 0.919159        |
| Sell          | Selectin, lymphocyte                                          | 0.2302        | ( 0.00001, 0.86 )         | 0.349432        |
| Selp          | Selectin, platelet                                            | 0.6239        | ( 0.33, 0.92 )            | 0.127502        |
| Sgce          | Sarcoglycan, epsilon                                          | 0.8957        | ( 0.41, 1.38 )            | 0.670762        |
| Sparc         | Secreted acidic cysteine rich glycoprotein                    | 1.1183        | ( 0.90, 1.33 )            | 0.278855        |
| Spock1        | Sparc/osteonectin, cwcv and kazal-like domains proteoglycan 1 | 0.6686        | ( 0.18, 1.15 )            | 0.376396        |
| Spp1          | Secreted phosphoprotein 1                                     | 1.0942        | ( 0.02, 2.17 )            | 0.511897        |
| Syt1          | Synaptotagmin I                                               | 4.9617        | ( 0.00001, 15.09 )        | 0.154091        |
| Tgfb1         | Transforming growth factor, beta induced                      | 1.3228        | ( 0.88, 1.77 )            | 0.178037        |
| Thbs1         | Thrombospondin 1                                              | 0.8531        | ( 0.75, 0.96 )            | 0.040002        |
| Thbs2         | Thrombospondin 2                                              | 3.2806        | ( 0.06, 6.50 )            | 0.051335        |
| Thbs3         | Thrombospondin 3                                              | 1.5986        | ( 0.78, 2.41 )            | 0.099082        |
| Timp1         | Tissue inhibitor of metalloproteinase 1                       | 1.0509        | ( 0.88, 1.22 )            | 0.493715        |
| Timp2         | Tissue inhibitor of metalloproteinase 2                       | 1.581         | ( 0.52, 2.65 )            | 0.219348        |
| Timp3         | Tissue inhibitor of metalloproteinase 3                       | 1.6668        | ( 1.29, 2.04 )            | 0.004066        |
| Tnc           | Tenascin C                                                    | 2.1979        | ( 0.72, 3.68 )            | 0.078169        |
| Vcam1         | Vascular cell adhesion molecule 1                             | 1.2305        | ( 1.11, 1.35 )            | 0.006313        |
| Vcan          | Versican                                                      | 0.9677        | ( 0.84, 1.09 )            | 0.619731        |
| Vtn           | Vitronectin                                                   | 0.918         | ( 0.17, 1.67 )            | 0.919721        |
| Actb          | Actin, beta                                                   | 0.9382        | ( 0.87, 1.00 )            | 0.124592        |
| B2m           | Beta-2 microglobulin                                          | 1.5399        | ( 1.34, 1.74 )            | 0.000434        |

|          |                                                           |        |                   |          |
|----------|-----------------------------------------------------------|--------|-------------------|----------|
| Gapdh    | Glyceraldehyde-3-phosphate dehydrogenase                  | 0.7839 | ( 0.67, 0.90 )    | 0.018572 |
| Gusb     | Glucuronidase, beta                                       | 0.8598 | ( 0.76, 0.96 )    | 0.059303 |
| Hsp90ab1 | Heat shock protein 90 alpha (cytosolic), class B member 1 | 0.7967 | ( 0.73, 0.87 )    | 0.002076 |
| MGDC     | Mouse Genomic DNA Contamination                           | 1.0706 | ( 0.00001, 2.20 ) | 0.632672 |
| RTC      | Reverse Transcription Control                             | 1.0655 | ( 0.00001, 2.32 ) | 0.593124 |
| RTC      | Reverse Transcription Control                             | 0.9417 | ( 0.00001, 1.99 ) | 0.544155 |
| RTC      | Reverse Transcription Control                             | 1.0093 | ( 0.00001, 2.11 ) | 0.564558 |
| PPC      | Positive PCR Control                                      | 1.1053 | ( 0.00001, 2.27 ) | 0.674324 |
| PPC      | Positive PCR Control                                      | 1.1279 | ( 0.00001, 2.42 ) | 0.667349 |
| PPC      | Positive PCR Control                                      | 1.1138 | ( 0.00001, 2.34 ) | 0.665537 |

\* = fold change greater than 2 (or less than 0.5) and statistically significant (p<0.05)

CI = confidence interval
